# Supplementary material for: Prevalence and risk factors of tuberculosis among people living with HIV/AIDS in China: a systematic review and meta-analysis
Source: Springer Nature journal article supplement (doi:10.1186/s12879-023-08575-4), 2023-09-06
Supplement: MOESM1 [file 26012738]

|        |     |                                                                                                                                                                                                                                                                                                                                                                                                                                                                                                                                                                                                                                                                                                                                                                             |           |
|--------|-----|-----------------------------------------------------------------------------------------------------------------------------------------------------------------------------------------------------------------------------------------------------------------------------------------------------------------------------------------------------------------------------------------------------------------------------------------------------------------------------------------------------------------------------------------------------------------------------------------------------------------------------------------------------------------------------------------------------------------------------------------------------------------------------|-----------|
|        | #8  | "Tuberculoses" [Title/Abstract] OR "Kochs Disease" [Title/Abstract] OR "Koch's Disease" [Title/Abstract] OR "Koch Disease" [Title/Abstract] OR "Mycobacterium tuberculosis Infection*" [Title/Abstract] OR "Infection*, Mycobacterium tuberculosis" [Title/Abstract] OR ("Tuberculosis"[Mesh])                                                                                                                                                                                                                                                                                                                                                                                                                                                                              | 204,232   |
|        | #9  | #5 AND #8                                                                                                                                                                                                                                                                                                                                                                                                                                                                                                                                                                                                                                                                                                                                                                   | 9,317     |
|        | #10 | "Prevalence"[Mesh]                                                                                                                                                                                                                                                                                                                                                                                                                                                                                                                                                                                                                                                                                                                                                          | 335,562   |
|        | #11 | (((((Prevalences[Title/Abstract]) OR (Period Prevalence[Title/Abstract])) OR (Period Prevalences[Title/Abstract])) OR (Prevalence, Period[Title/Abstract])) OR (Point Prevalence[Title/Abstract])) OR (Point Prevalences[Title/Abstract])) OR (Prevalence, Point[Title/Abstract])                                                                                                                                                                                                                                                                                                                                                                                                                                                                                           | 23,213    |
|        | #12 | (relative[Title/Abstract] AND risk*[Title/Abstract]) OR (relative risk[Text Word]) OR risks[Text Word] OR cohort studies[MeSH:noexp] OR (cohort[Title/Abstract] AND stud*[Title/Abstract]) OR cross-sectional studies[MeSH:noexp] OR (cross-sectional[Title/Abstract] AND stud*[Title/Abstract]) OR case-control studies[MeSH:noexp] OR (case-control[Title/Abstract] AND stud*[Title/Abstract])                                                                                                                                                                                                                                                                                                                                                                            | 1,952,829 |
|        | #13 | #10 OR #11 OR #12                                                                                                                                                                                                                                                                                                                                                                                                                                                                                                                                                                                                                                                                                                                                                           | 2,180,020 |
|        | #14 | #9 AND #13                                                                                                                                                                                                                                                                                                                                                                                                                                                                                                                                                                                                                                                                                                                                                                  | 2,360     |
| Embase | #1  | 'human immunodeficiency virus'/exp<br>'immunodeficiency virus*', human':ti,ab OR 'virus*', human immunodeficiency':ti,ab OR 'human t cell lymphotropic virus type iii':ti,ab OR 'human t-cell lymphotropic virus type iii':ti,ab OR 'human t-cell leukemia virus type iii':ti,ab OR 'human t cell leukemia virus type iii':ti,ab OR 'lav-hltv-iii':ti,ab OR 'lymphadenopathy-associated virus*':ti,ab OR 'lymphadenopathy associated virus':ti,ab OR 'virus*', lymphadenopathy-associated':ti,ab OR 'human t lymphotropic virus type iii':ti,ab OR 'human t-lymphotropic virus type iii':ti,ab OR 'aids virus*':ti,ab OR 'virus*', aids':ti,ab OR 'acquired immune deficiency syndrome virus':ti,ab OR 'acquired immunodeficiency syndrome virus':ti,ab OR 'htlv-iii':ti,ab | 214,231   |
|        | #2  | 'acquired immune deficiency syndrome'/exp<br>'immunologic deficiency syndrome, acquired':ti,ab OR 'acquired immune deficiency syndrome':ti,ab OR 'acquired immunodeficiency syndrome*':ti,ab OR 'acquired immuno deficiency syndrome':ti,ab OR 'immuno-deficiency syndrome*,acquired':ti,ab OR 'syndrome*,acquired immuno-deficiency':ti,ab OR 'immunodeficiency syndrome*, acquired':ti,ab OR 'acquired immunodeficiency syndromes':ti,ab OR 'syndrome*, acquired immunodeficiency':ti,ab OR 'aids':ti,ab                                                                                                                                                                                                                                                                  | 3,885     |
|        | #3  | 'acquired immune deficiency syndrome'/exp<br>'immunologic deficiency syndrome, acquired':ti,ab OR 'acquired immune deficiency syndrome':ti,ab OR 'acquired immunodeficiency syndrome*':ti,ab OR 'acquired immuno deficiency syndrome':ti,ab OR 'immuno-deficiency syndrome*,acquired':ti,ab OR 'syndrome*,acquired immuno-deficiency':ti,ab OR 'immunodeficiency syndrome*, acquired':ti,ab OR 'acquired immunodeficiency syndromes':ti,ab OR 'syndrome*, acquired immunodeficiency':ti,ab OR 'aids':ti,ab                                                                                                                                                                                                                                                                  | 152,688   |
|        | #4  | 'acquired immune deficiency syndrome'/exp<br>'immunologic deficiency syndrome, acquired':ti,ab OR 'acquired immune deficiency syndrome':ti,ab OR 'acquired immunodeficiency syndrome*':ti,ab OR 'acquired immuno deficiency syndrome':ti,ab OR 'immuno-deficiency syndrome*,acquired':ti,ab OR 'syndrome*,acquired immuno-deficiency':ti,ab OR 'immunodeficiency syndrome*, acquired':ti,ab OR 'acquired immunodeficiency syndromes':ti,ab OR 'syndrome*, acquired immunodeficiency':ti,ab OR 'aids':ti,ab                                                                                                                                                                                                                                                                  | 190,496   |

|          |     |                                                                                                                                                                                                                                                                                                                                                                                                                                                                                                                                                                                                                                                                                                                                                                                                                            |           |
|----------|-----|----------------------------------------------------------------------------------------------------------------------------------------------------------------------------------------------------------------------------------------------------------------------------------------------------------------------------------------------------------------------------------------------------------------------------------------------------------------------------------------------------------------------------------------------------------------------------------------------------------------------------------------------------------------------------------------------------------------------------------------------------------------------------------------------------------------------------|-----------|
|          | #5  | #1 OR #2 OR #3 OR #4                                                                                                                                                                                                                                                                                                                                                                                                                                                                                                                                                                                                                                                                                                                                                                                                       | 420,604   |
|          | #6  | 'tuberculosis'/exp                                                                                                                                                                                                                                                                                                                                                                                                                                                                                                                                                                                                                                                                                                                                                                                                         | 289,990   |
|          | #7  | 'tuberculoses':ti,ab OR 'kochs disease':ti,ab OR 'koch disease':ti,ab<br>OR 'mycobacterium tuberculosis infection*':ti,ab OR 'infection*,'<br>mycobacterium tuberculosis':ti,ab                                                                                                                                                                                                                                                                                                                                                                                                                                                                                                                                                                                                                                            | 3,959     |
|          | #8  | #6 OR #7                                                                                                                                                                                                                                                                                                                                                                                                                                                                                                                                                                                                                                                                                                                                                                                                                   | 290,480   |
|          | #9  | 'prevalence'/exp                                                                                                                                                                                                                                                                                                                                                                                                                                                                                                                                                                                                                                                                                                                                                                                                           | 917,465   |
|          | #10 | 'period prevalence*':ti,ab OR 'prevalence, period':ti,ab OR 'point<br>prevalence*':ti,ab OR 'prevalence, point':ti,ab                                                                                                                                                                                                                                                                                                                                                                                                                                                                                                                                                                                                                                                                                                      | 10,362    |
|          | #11 | 'risk factor'/exp                                                                                                                                                                                                                                                                                                                                                                                                                                                                                                                                                                                                                                                                                                                                                                                                          | 1,256,250 |
|          | #12 | 'factor, risk':ti,ab OR 'risk factor':ti,ab OR 'social risk factors*':ti,ab<br>OR 'factor*, social risk':ti,ab OR 'risk factor*, social':ti,ab OR<br>'health correlates':ti,ab OR 'correlates, health':ti,ab OR 'population*<br>at risk':ti,ab OR 'risk scores*':ti,ab OR 'score, risk':ti,ab OR 'risk<br>factor scores*':ti,ab OR 'score, risk factor':ti,ab                                                                                                                                                                                                                                                                                                                                                                                                                                                              | 398,006   |
|          | #13 | #9 OR #10 OR #11 OR #12                                                                                                                                                                                                                                                                                                                                                                                                                                                                                                                                                                                                                                                                                                                                                                                                    | 2,153,871 |
|          | #14 | #5 AND #8 AND #13                                                                                                                                                                                                                                                                                                                                                                                                                                                                                                                                                                                                                                                                                                                                                                                                          | 4,202     |
|          | #15 | #14 AND ('case control study'/de OR 'cohort analysis'/de OR 'cross<br>sectional study'/de OR 'observational study'/de)                                                                                                                                                                                                                                                                                                                                                                                                                                                                                                                                                                                                                                                                                                     | 779       |
| Cochrane | #1  | MeSH descriptor: [Acquired Immunodeficiency Syndrome]<br>explode all trees                                                                                                                                                                                                                                                                                                                                                                                                                                                                                                                                                                                                                                                                                                                                                 | 2,054     |
|          | #2  | (Immunologic Deficiency Syndrome, Acquired):ti,ab,kw OR<br>(Acquired Immune Deficiency Syndrome):ti,ab,kw OR (Acquired<br>Immuno Deficiency Syndrome):ti,ab,kw OR (Immuno-Deficiency<br>Syndrome*, Acquired):ti,ab,kw OR (Syndrome*, Acquired<br>Immuno-Deficiency):ti,ab,kw OR (Immunodeficiency Syndrome*,<br>Acquired):ti,ab,kw OR (Acquired Immunodeficiency<br>Syndromes):ti,ab,kw OR (Syndrome*, Acquired<br>Immunodeficiency):ti,ab,kw OR (AIDS):ti,ab,kw                                                                                                                                                                                                                                                                                                                                                           | 11,825    |
|          | #3  | MeSH descriptor: [HIV] explode all trees                                                                                                                                                                                                                                                                                                                                                                                                                                                                                                                                                                                                                                                                                                                                                                                   | 3,275     |
|          | #4  | (immunodeficiency virus*, human):ti,ab,kw OR (virus*, human<br>immunodeficiency):ti,ab,kw OR (human t cell lymphotropic virus<br>type iii):ti,ab,kw OR (human t-cell lymphotropic virus type<br>iii):ti,ab,kw OR (human t-cell leukemia virus type iii):ti,ab,kw OR<br>(human t cell leukemia virus type iii):ti,ab,kw OR (lav-htlv-<br>iii):ti,ab,kw OR (lymphadenopathy-associated virus*):ti,ab,kw OR<br>(lymphadenopathy associated virus):ti,ab,kw OR (virus*,<br>lymphadenopathy-associated):ti,ab,kw OR (human t lymphotropic<br>virus type iii):ti,ab,kw OR (human t-lymphotropic virus type<br>iii):ti,ab,kw OR (aids virus*):ti,ab,kw OR (virus*, aids):ti,ab,kw<br>OR (acquired immune deficiency syndrome virus):ti,ab,kw OR<br>(acquired immunodeficiency syndrome virus):ti,ab,kw OR (htlv-<br>iii):ti,ab,kw | 3,285     |
|          | 5   | #1 or #2 or #3 or #4                                                                                                                                                                                                                                                                                                                                                                                                                                                                                                                                                                                                                                                                                                                                                                                                       | 14,768    |

|                |     |                                                                                                                                                                                                                                                                                                                                                                                                                                                                                                                                                                                                                                                                                                                                                                                                                                                                                                                                                                                                                                                                                    |           |
|----------------|-----|------------------------------------------------------------------------------------------------------------------------------------------------------------------------------------------------------------------------------------------------------------------------------------------------------------------------------------------------------------------------------------------------------------------------------------------------------------------------------------------------------------------------------------------------------------------------------------------------------------------------------------------------------------------------------------------------------------------------------------------------------------------------------------------------------------------------------------------------------------------------------------------------------------------------------------------------------------------------------------------------------------------------------------------------------------------------------------|-----------|
|                | #6  | MeSH descriptor: [Tuberculosis] explode all trees                                                                                                                                                                                                                                                                                                                                                                                                                                                                                                                                                                                                                                                                                                                                                                                                                                                                                                                                                                                                                                  | 2,637     |
|                | #7  | (Tuberculoses):ti,ab,kw OR (Kochs Disease):ti,ab,kw OR (Koch's Disease):ti,ab,kw OR (Koch Disease):ti,ab,kw OR (Mycobacterium tuberculosis Infection*):ti,ab,kw OR (Infection*, Mycobacterium tuberculosis):ti,ab,kw                                                                                                                                                                                                                                                                                                                                                                                                                                                                                                                                                                                                                                                                                                                                                                                                                                                               | 596       |
|                | #8  | #6 or #7                                                                                                                                                                                                                                                                                                                                                                                                                                                                                                                                                                                                                                                                                                                                                                                                                                                                                                                                                                                                                                                                           | 2,946     |
|                | #9  | MeSH descriptor: [Prevalence] explode all trees                                                                                                                                                                                                                                                                                                                                                                                                                                                                                                                                                                                                                                                                                                                                                                                                                                                                                                                                                                                                                                    | 4,978     |
|                | #10 | (period prevalence*):ti,ab,kw OR (prevalence, period):ti,ab,kw OR (point prevalence*):ti,ab,kw OR (prevalence, point):ti,ab,kw                                                                                                                                                                                                                                                                                                                                                                                                                                                                                                                                                                                                                                                                                                                                                                                                                                                                                                                                                     | 9,571     |
|                | #11 | MeSH descriptor: [Risk Factors] explode all trees                                                                                                                                                                                                                                                                                                                                                                                                                                                                                                                                                                                                                                                                                                                                                                                                                                                                                                                                                                                                                                  | 26,359    |
|                | #12 | (Factor, Risk):ti,ab,kw OR (Risk Factor):ti,ab,kw OR (Social Risk Factors*):ti,ab,kw OR (Factor*, Social Risk):ti,ab,kw OR (Risk Factor*, Social):ti,ab,kw OR (Health Correlates):ti,ab,kw OR (Correlates, Health):ti,ab,kw OR (population* at Risk):ti,ab,kw OR (Risk Scores*):ti,ab,kw OR (Score, Risk):ti,ab,kw OR (Risk Factor Scores*):ti,ab,kw OR (Score, Risk Factor):ti,ab,kw                                                                                                                                                                                                                                                                                                                                                                                                                                                                                                                                                                                                                                                                                              | 119,682   |
|                | #13 | #9 or #10 or #11 or #12                                                                                                                                                                                                                                                                                                                                                                                                                                                                                                                                                                                                                                                                                                                                                                                                                                                                                                                                                                                                                                                            | 143,582   |
|                | #14 | #5 and #8 and #13                                                                                                                                                                                                                                                                                                                                                                                                                                                                                                                                                                                                                                                                                                                                                                                                                                                                                                                                                                                                                                                                  | 62        |
| Web of science | #1  | TS=((Acquired Immunodeficiency Syndrome) OR (Immunologic Deficiency Syndrome, Acquired) OR (Acquired Immune Deficiency Syndrome) OR (Acquired Immuno Deficiency Syndrome) OR (Immuno-Deficiency Syndrome*, Acquired) OR (Syndrome*, Acquired Immuno-Deficiency) OR (Immunodeficiency Syndrome*, Acquired) OR (Acquired Immunodeficiency Syndromes) OR (Syndrome*, Acquired Immunodeficiency) OR (AIDS) OR (HIV) OR (Human Immunodeficiency Virus*) OR (Immunodeficiency Virus*, Human) OR (Virus*, Human Immunodeficiency) OR (Human T Cell Lymphotropic Virus Type III) OR (Human T-Cell Lymphotropic Virus Type III) OR (Human T-Cell Leukemia Virus Type III) OR (Human T Cell Leukemia Virus Type III) OR (LAV-HTLV-III) OR (Lymphadenopathy-Associated Virus*) OR (Lymphadenopathy Associated Virus) OR (Virus*, Lymphadenopathy-Associated) OR (Human T Lymphotropic Virus Type III) OR (Human T-Lymphotropic Virus Type III) OR (AIDS Virus*) OR (Virus*, AIDS) OR (Acquired Immune Deficiency Syndrome Virus) OR (Acquired Immunodeficiency Syndrome Virus) OR (HTLV-III)) | 737,536   |
|                | #2  | TS=((Tuberculoses) OR (Kochs Disease) OR (Koch's Disease) OR (Koch Disease) OR (Mycobacterium tuberculosis Infection*) OR (Infection*, Mycobacterium tuberculosis) OR (Tuberculosis) )                                                                                                                                                                                                                                                                                                                                                                                                                                                                                                                                                                                                                                                                                                                                                                                                                                                                                             | 129,454   |
|                | #3  | TS=((prevalence*) OR (Period Prevalence*) OR (Prevalence, Period) OR (Point Prevalence*) OR (Prevalence, Point) OR (Factor, Risk) OR (Risk Factor) OR (Social Risk Factors*) OR                                                                                                                                                                                                                                                                                                                                                                                                                                                                                                                                                                                                                                                                                                                                                                                                                                                                                                    | 2,328,392 |

---

|    |                                                                                                                                                                                                                                 |       |
|----|---------------------------------------------------------------------------------------------------------------------------------------------------------------------------------------------------------------------------------|-------|
|    | (Factor*, Social Risk) OR (Risk Factor*, Social) OR (Health Correlates) OR (Correlates, Health) OR (population* at Risk) OR (Risk Scores*) OR (Score, Risk) OR (Risk Factor Scores*) OR (Score, Risk Factor) OR (Risk Factors)) |       |
| #4 | #3 AND #2 AND #1                                                                                                                                                                                                                | 6,745 |
| #5 | #4 and PEOPLES R CHINA                                                                                                                                                                                                          | 263   |

---
